1

2

3

**Formaldehyde-responsive proteins, TtmR and EfgA, reveal a tradeoff between  
formaldehyde resistance and efficient transition to methylotrophy in *Methylorubrum  
extorquens***

6

7

Jannell V. Bazurto<sup>1,2,3,4,5,6</sup>, Eric L. Bruger<sup>1,2,3</sup>, Jessica A. Lee<sup>1,2,3,7</sup>, Leah B. Lambert<sup>1</sup>, and

8

Christopher J. Marx<sup>1,2,3</sup>.

9

10 **Running title:**

11 TtmR and EfgA role in the transition to methylotrophy

12

13 **Keywords:**

14 Methylotrophy, formaldehyde, stress response, adaptation, tradeoffs, Enhanced formaldehyde  
15 growth protein A (EfgA), MarR transcription factor

16

17 **Affiliations:**

18 <sup>1</sup>Department of Biological Sciences, University of Idaho, Moscow, ID

19 <sup>2</sup>Institute for Modeling Collaboration and Innovation, University of Idaho, Moscow, ID

20 <sup>3</sup>Institute for Bioinformatics and Evolutionary Studies, University of Idaho, Moscow, ID

21 <sup>4</sup>Department of Plant and Microbial Biology, University of Minnesota, Twin Cities, MN

22 <sup>5</sup>Microbial and Plant Genomics Institute, University of Minnesota, Twin Cities, MN

23 <sup>6</sup>Biotechnology Institute, University of Minnesota, Twin Cities, MN

24 <sup>7</sup>NASA Ames Research Center, Moffett Field, CA

25

26 **Contributions:**

27 Jannell V. Bazurto: Conceptualization, funding acquisition, investigation, methodology,

28 visualization, writing - original draft preparation, writing – review & editing

29 Eric L. Bruger: Conceptualization, funding acquisition, investigation, methodology,

30 visualization, writing - original draft preparation, writing – review & editing

31 Jessica A. Lee: Conceptualization, investigation, methodology, writing - original draft

32 preparation, writing – review & editing

33 Leah B. Lambert: Funding acquisition, investigation

34 Christopher J. Marx: Conceptualization, funding acquisition, project administration, resources,

35 supervision, writing - original draft preparation, writing – review & editing

36

37 **Acknowledgements:**

38 We thank Juan E. Abrahante of the University of Minnesota Informatics Institute (UMII) for

39 assistance with the pipeline for RNA-Seq data analysis and Siavash Riazi for assistance with

40 modifying R scripts. We thank members of the Marx laboratory and Lon Chubiz for critical

41 reading of this manuscript. The flow cytometry was carried out at the IBEST Optical Imaging

42 Core at the University of Idaho (IBEST is supported in part by NIH COBRE grant  
43 P30GM103324). This work was supported by funding from an Army Research Office MURI  
44 sub-award to CJM (W911NF-12-1-0390), a CMCI Pilot Grant to CJM (parent NIH award  
45 P20GM104420), an INBRE Undergraduate Research Fellowship to LBL (parent NIH award  
46 P20GM103408), and a BEACON Center for Evolution in Action Pilot Grants to JVB and ELB  
47 (NSF Cooperative Agreement DBI-0939454).

48

49

50

51

52 ABSTRACT

53 For bacteria to thrive they must be well-adapted to their environmental niche, which may involve  
54 specialized metabolism, timely adaptation to shifting environments, and/or the ability to mitigate  
55 numerous stressors. These attributes are highly dependent on cellular machinery that can sense  
56 both the external and intracellular environment. *Methylorubrum extorquens* is an extensively  
57 studied facultative methylotroph, an organism that can use single-carbon compounds as their sole  
58 source of carbon and energy. In methylotrophic metabolism, carbon flows through formaldehyde  
59 as a central metabolite; thus, formaldehyde is both an obligate metabolite and a metabolic stressor.  
60 Via the one-carbon dissimilation pathway, free formaldehyde is rapidly incorporated by  
61 formaldehyde activating enzyme (Fae), which is constitutively expressed at high levels. In the  
62 presence of elevated formaldehyde levels, a recently identified formaldehyde-sensing protein,  
63 EfgA, induces growth arrest. Herein, we describe TtmR, a formaldehyde-responsive transcription  
64 factor that, like EfgA, modulates formaldehyde resistance. TtmR is a member of the MarR family  
65 of transcription factors and impacts the expression of 75 genes distributed throughout the genome,  
66 many of which are transcription factors and/or involved in stress response, including *efgA*.  
67 Notably, when *M. extorquens* is adapting its metabolic network during the transition to  
68 methylotrophy, *efgA* and *ttmR* mutants experience an imbalance in formaldehyde production and  
69 a notable growth delay. Although methylotrophy necessitates that *M. extorquens* maintain a  
70 relatively high level of formaldehyde tolerance, this work reveals a tradeoff between formaldehyde  
71 resistance and the efficient transition to methylotrophic growth and suggests that TtmR and EfgA  
72 play a pivotal role in maintaining this balance.

73

74

75 **Importance:** All organisms produce formaldehyde as a byproduct of enzymatic reactions and as  
76 a degradation product of metabolites. The ubiquity of formaldehyde in cellular biology suggests  
77 all organisms have evolved mechanisms of mitigating formaldehyde toxicity. However,  
78 formaldehyde-sensing is poorly described and prevention of formaldehyde-induced damage is  
79 primarily understood in the context of detoxification. Here we use an organism that is regularly  
80 exposed to elevated intracellular formaldehyde concentrations through high-flux one-carbon  
81 utilization pathways to gain insight into the role of formaldehyde-responsive proteins that  
82 modulate formaldehyde resistance. Using a combination of genetic and transcriptomic analyses,  
83 we identify dozens of genes putatively involved in formaldehyde resistance, determined the  
84 relationship between two different formaldehyde response systems and identified an inherent  
85 tradeoff between formaldehyde resistance and optimal transition to methylotrophic metabolism.

86

87

88

89

90 INTRODUCTION

91 Methylo trophy, a trait found in all domains of life, is the unique metabolic ability of organisms to  
92 use one- or multi-carbon compounds lacking carbon-carbon bonds, as sole sources of carbon and  
93 energy. Growth substrates for methylo trophs include compounds such as methane  
94 (methano trophs), methanol, and methylamines (mono-, di-, tri-), and methylated sulfur species. A  
95 key feature of methylo trophic metabolism is that each carbon of the growth substrate flows through  
96 the potent toxin formaldehyde as a central intermediate. Formaldehyde is harmful to all cell types  
97 because of its reactivity with electrophiles such as free amines and thiols. It can form adducts with  
98 or crosslink a number of biological molecules such as DNA and proteins. Despite the centrality of  
99 formaldehyde in methylo trophic metabolism, until very recently formaldehyde-specific stress  
100 responses had not been described in methylo trophs.

101 In *Methylorubrum* (formerly *Methylobacterium*) *extorquens* AM1 the most extensively studied  
102 facultative methylo troph, the intracellular formaldehyde concentration is estimated at ~ 1 mM  
103 during growth on methanol (1). Methanol is directly oxidized to formaldehyde in the periplasm  
104 by methanol dehydrogenase (MDH). Free endogenous formaldehyde is kept relatively low in the  
105 cytoplasm by formaldehyde activating enzyme (Fae), which condenses formaldehyde with the C<sub>1</sub>  
106 carrier dephosphotetrahydromethanopterin (dH<sub>4</sub>MPT); this is the first of three reactions in the  
107 pterin-dependent dissimilatory pathway that oxidizes formaldehyde to formate (2–4). Previous  
108 work has demonstrated that strains defective in formaldehyde dissimilation by disruption of  
109 pathway enzymes (*fae*) or synthesis of the dH<sub>4</sub>MPT C<sub>1</sub> carrier (*mptG*) are sensitive to methanol  
110 (4). Formate is the branchpoint metabolite and can be further oxidized to CO<sub>2</sub> for energy  
111 production or shunted toward a tetrahydrofolate-dependent assimilation pathway for ultimate  
112 incorporation into biomass via the serine cycle (5, 6).

113 Very recently experimental evolution of *M. extorquens* PA1 for growth on formaldehyde as a sole  
114 source of carbon and energy revealed multiple loci that could increase formaldehyde resistance  
115 (7). Although dissimilation by the dH<sub>4</sub>MPT pathway is the primary mechanism for removing free  
116 formaldehyde from the cytoplasm (3, 4), none of the beneficial mutations were in these genes.  
117 Instead, this work found that single mutations in one of three genetic loci (*efgA*, *def*, *Mext\_0925*)  
118 could independently confer the ability to use formaldehyde as a sole source of carbon and energy.  
119 The most frequent class of mutations (nearly 80%) were loss-of-function mutations in enhanced  
120 formaldehyde growth protein A (EfgA), a protein that directly binds formaldehyde and halts  
121 translation in the presence of excess formaldehyde by an unknown mechanism. Though strains  
122 lacking EfgA can grow in the presence of higher formaldehyde concentrations than wild-type, the  
123 absence of EfgA increases methanol sensitivity in strains that are vulnerable to formaldehyde stress  
124 (*fae*, *mptG*), suggesting that the physiological role of EfgA is to decrease formaldehyde-induced  
125 stress. Peptide deformylase (PDF, encoded by *def*), is a ribosomally-associated enzyme that is  
126 essential for translation and involved in protein quality control (8). Selection for mutations in *def*,  
127 provided further evidence for the importance of translational regulation in response to  
128 formaldehyde stress.

129 *Mext\_0925* is a homolog of the MarR transcription factor (7). This family of regulators is found  
130 in bacteria and archaea and was originally characterized in *Escherichia coli* (9–12). In *E. coli*,  
131 MarR is encoded by the multiple antibiotic resistance (*mar*) operon. It is a ligand-sensing repressor  
132 that binds the operator of the *marRAB* operon in the absence of ligand and is thus self-regulating  
133 (13, 14). A number of structurally distinct compounds such as tetracycline, chloramphenicol, and  
134 salicylate can bind MarR and induce conformational changes that lead to DNA release (19).  
135 Additionally, the *marRAB* operon can be activated by aromatic amino acid metabolites directly

136 and indirectly (15). Subsequently, *marRAB* expression gives rise to the transcription factor MarA,  
137 a member of the AraC/XylS family, which in turn upregulates dozens of genes that contribute to  
138 resistance to multiple antibiotics, oxidative stress, and organic solvent stress (16–18). Broader  
139 examination of MarR homologs in a variety of organisms show that homologs i) can be repressors,  
140 activators, or both, ii) have highly variable regulon sizes, and iii) control a variety of cellular  
141 processes involved in various stress responses and metabolic pathways (19).

142 In *Bacillus subtilis*, the MarR homolog HxlR has a role in formaldehyde stress response (20, 21).  
143 *hxlR* is divergently transcribed from the *hxlAB* operon that HxlR positively regulates. The *hxlAB*  
144 operon encodes two key proteins of the ribulose monophosphate pathway of formaldehyde  
145 detoxification and is induced by exogenous formaldehyde (20, 22). *In vitro*, formaldehyde does  
146 not impact binding of HxlR and, as is the case with several MarR homologs, the mechanism of  
147 activation has remained elusive. In some instances, however, the mechanism of activation of MarR  
148 homologs is clear. For example, in organisms such as *Acinetobacter baylyi* and *Streptomyces*  
149 *coelicolor*, where MarR homologs regulate operons encoding enzymes required for the catabolism  
150 of aromatic lignin-derivatives such as ferulate and protocatechuate, respectively, ligand binding  
151 leads to release of cognate DNA and the operon is derepressed (19, 23–25). This leads to  
152 expression of the relevant enzymes and the ligand/carbon substrates are utilized.

153 Herein, we probe the physiological role of Mext\_0925, implicated in modulating formaldehyde  
154 resistance. Unlike many described MarR homologs, *Mext\_0925* is not in an operon or divergently  
155 transcribed from an operon, thus there is no genomic context for discerning its regulon. In the  
156 absence of obvious genetic associations, we opted to use transcriptomic analyses to identify  
157 differentially expressed genes in a  $\Delta Mext\_0925$  mutant. By coupling this approach with *in vivo*  
158 genetic studies, we find that *Mext\_0925* is specifically responsive to formaldehyde stress. Our



159 results define the relationship between Mext\_0925 and EfgA, the only characterized formaldehyde  
160 stress response system in *M. extorquens*, and demonstrate that the ability of *M. extorquens* to  
161 respond to formaldehyde stress at the transcriptional and translational levels is critical for the  
162 optimal transition to methylotrophy. Based on our findings, we conclude that Mext\_0925  
163 represents a second formaldehyde-specific response system in *M. extorquens* and suggest the name  
164 TtmR, for a regulator of the transition to methylotrophy.

165

## 166 MATERIALS AND METHODS

### 167 **Bacterial strains, media, and chemicals**

168 Bacterial strains used in this study (Table S1) are derivatives of *Methylorubrum extorquens* PA1  
169 (formerly *Methylobacterium*) (26–28) where genes for cellulose synthesis were deleted to prevent  
170 aggregation and optimize liquid growth measurements (29). Therefore, the genotype referred to  
171 herein as ‘wild-type’ (CM2730) is more accurately  $\Delta celABC$ . The  $\Delta efgA$  mutant (CM3745)  
172 additionally has a markerless deletion that eliminated 404 bp from the ORF of *Mext\_4158* (21-  
173 424/435 bp) (7) and the  $\Delta ttmR$  mutant (CM4732) has a markerless deletion of the entire coding  
174 region (588 bp) of *Mext\_0925*. All growth experiments with liquid medium were performed with  
175 *Methylobacterium* PIPES (MP) medium (29) with 3.5 mM succinate, 15 mM methanol, or 2, 4, 6,  
176 8, 10 mM formaldehyde as a carbon source. For growth on solid MP medium, Bacto Agar (15 g/L,  
177 BD Diagnostics) was added and carbon source concentrations were elevated (15 mM succinate,  
178 125 mM methanol). Formaldehyde stock solutions (1 M) were prepared by boiling a mixture of  
179 0.3 g paraformaldehyde and 10 mL of 0.05 N NaOH in a sealed tube for 20 min; stock solutions  
180 were kept at room temperature and made fresh weekly. When present in the media, kanamycin  
181 was used at a final concentration of 50  $\mu\text{g}/\text{mL}$ .

### 182 **Genetic approaches**

183 Markerless deletions were generated by allelic exchange as previously described using either  
184 pCM433 (30) or pPS04\_(7). Vectors were designed using SnapGene software. The HiFi  
185 assembly kit from New England Biolabs was used to construct vectors from linearized vector  
186 backbone (restriction enzyme-digested) and PCR-generated inserts.

187

## 188 **Growth quantitation**

189 To initiate liquid growth, individual colonies were used to inoculate 2 mL MP medium containing  
190 3.5 mM succinate or 15 mM methanol in biological triplicate. Cultures were shaken (250 rpm)  
191 during incubation at 30 °C for 24 hr (succinate) or 36 hr (methanol) and then subcultured (1/64)  
192 into 5 mL of identical medium for further acclimation. After this second 24-36 hr (succinate) or  
193 36-48 hr (methanol) incubation, the stationary phase acclimation cultures were again subcultured  
194 (1/64) into relevant media for growth measurements. Cell density was determined by monitoring  
195 absorbance with a Spectronic 200 (Thermo Scientific) or a SmartSpec Plus (Bio-Rad) at 600 nm.  
196 Final yield is defined as the absorbance reached upon entry into stationary phase. Cell viability  
197 was determined by harvesting cells from a 100 µL aliquot of culture by centrifugation, discarding  
198 supernatant and resuspending the cell pellet into an equal volume of MP medium (no carbon). Cell  
199 suspensions were then serially diluted (1/10 dilutions, 200 µL total volume) in 96 well polystyrene  
200 plates with MP medium (no carbon) and 10 µL aliquots of each dilution were spotted to MP  
201 medium plates (15 mM succinate) using technical triplicates. Plates were inverted and incubated  
202 at 30 °C until colony formation was apparent (4-6 d) at which point colonies were counted.  
203 Technical triplicates were averaged for each sample; biological replicates were averaged.

## 204 **Formaldehyde quantification**

205 Formaldehyde concentrations in the culture media were measured as previously described (31).  
206 Supernatant from a 100 µL aliquot of culture was isolated by centrifugation (14,000 x g). In  
207 technical triplicate, 10 µL of the supernatant or 100 µL of 0.1X supernatant (diluted with MP  
208 medium, no carbon) was combined with 190 or 100 µL Nash reagent B (2 M ammonium acetate,

209 50 mM glacial acetic acid, 20 mM acetylacetone), respectively, in 96 well polystyrene plates.  
210 Reaction plates were incubated (60 °C, 10 min), cooled to room temp (5 min), and absorbance was  
211 read at 432 nm on a Wallac 1420 VICTOR Multilabel reader (Perkin Elmer). Formaldehyde  
212 standards were prepared daily from 1 M formaldehyde stock solutions and a standard curve was  
213 read alongside all sample measurements.

#### 214 **RNA-Sequencing analysis**

215 The WT (CM2730) and the  $\Delta ttmR$  mutant (CM4732) were grown in biological triplicate in MP  
216 medium with 15 mM methanol as described above. The final growth vessel was a 250 mL flask,  
217 with a culture volume of 100 mL. When OD<sub>600</sub> reached 0.2-0.3, cells from 50 mL of culture were  
218 harvested by centrifugation in an Eppendorf Centrifuge 5810R (5 min, 4,000xg, 4 °C). The  
219 supernatant was decanted and cells were washed with ice cold MP medium (no carbon) and  
220 centrifuged once more to remove wash supernatant. Pellets were immediately frozen by  
221 submerging tubes in liquid nitrogen and stored at -80 °C.

222 Nucleic acid extraction and molecular manipulation (RNA extraction, cDNA generation, library  
223 preparation) and sequencing were conducted by Genewiz (South Plainfield, NJ). The total RNA  
224 was extracted with the RNeasy Plus Mini Kit (Qiagen); rRNA was depleted with the Ribo-Zero  
225 rRNA removal kit (Illumina); the quality of resulting RNA samples was determined with an  
226 Agilent 2100 BioAnalyzer and Qubit assay. Once the cDNA library was generated, it was  
227 sequenced on an Illumina HiSeq (2x150 bp). The raw data (FASTQ format) was provided to  
228 investigators for further analysis.

229 An analysis pipeline developed by the University of Minnesota Genomics Center and the Research  
230 Informatics Solutions (RIS) group at the University of Minnesota Supercomputing Institute was

231 used for data analysis. The pipeline uses FastQC (32) to assess the quality of the sequencing data,  
232 Trimmomatic (33) to remove the low quality bases and adapter sequences, HISAT2 (34) to align  
233 the curated reads to the *M. extorquens* PA1 genome [GenBank accession: CP000908.1], Cuffquant  
234 and Cufnorm from the Cufflinks package (35) to generate FPKM expression values, and  
235 featureCounts from the Rsubread R package (36) to generate raw read counts. DESeq2 was used  
236 to convert raw count data to normalized counts and all further statistical analyses were carried out  
237 in R (37). Differentially expressed genes in the  $\Delta ttmR$  mutant were identified by a pair-wise  
238 comparison to the WT strain and had a  $\log_2$  fold change  $> 1$  and a False Discovery Rate (FDR)  
239 adjusted p-value  $< 0.05$ .

#### 240 **Stress tests**

241 For all tests, cultures of WT (CM2730) and the *ttmR<sup>EVO</sup>* mutant (CM3919) were grown in  
242 biological triplicate in MP medium (succinate), as described above.

#### 243 *Alternative aldehyde growth assays.*

244 Growth was quantified in liquid media as described above with succinate or methanol as the  
245 primary carbon source. Wild-type (CM2730) was subjected to variable glyoxal, acetaldehyde,  
246 glutaraldehyde, butyraldehyde, and propionaldehyde (up to 10 mM) to identify a concentration  
247 that would lead to a growth defect but allow growth within a 24 hr period. Once the working  
248 concentrations were identified (1.25 mM for acetaldehyde and glyoxal, 2.5 mM for the remaining  
249 aldehydes), the *ttmR<sup>EVO</sup>* (CM3919) and  $\Delta efgA$  (CM3745) mutants were grown in identical  
250 conditions, alongside the wild-type control.

#### 251 *Antibiotic resistance assays.*

252 Stationary phase cultures (100  $\mu$ L) in MP medium (succinate) were used to inoculate 3.5 mL of  
253 soft agar (0.8%) that was previously melted and then cooled to  $\sim$  50  $^{\circ}$ C. Inoculated soft agar was  
254 agitated by vortex ( $\sim$  10 sec) and then overlaid to solid MP medium (succinate). Soft agar overlays  
255 were allowed to solidify at room temperature for 1-2 hr. Antibiotic discs (VWR) saturated with  
256 absolute amounts of individual antibiotics (novobiocin (5  $\mu$ g), tetracycline (30  $\mu$ g), streptomycin  
257 (10  $\mu$ g), chloramphenicol (30  $\mu$ g), colistin (10  $\mu$ g), cefoxitin (30  $\mu$ g), gentamycin (10  $\mu$ g),  
258 erythromycin (15  $\mu$ g), rifampicin (5  $\mu$ g), ciprofloxacin (10  $\mu$ g), vancomycin (30  $\mu$ g), kanamycin  
259 (30  $\mu$ g), nalidixic acid (30  $\mu$ g), ampicillin (10  $\mu$ g)) were placed on top of agar plates with sterile  
260 tweezers. Plates were incubated at 30  $^{\circ}$ C for  $\sim$  24 hr and then scored for diameter of resulting zones  
261 of inhibition.

262 *Oxidative stress.*

263 Stationary phase cultures were used to prepare soft agar overlays as described for antibiotic  
264 resistance assays. After solidification, 5  $\mu$ L of 30 % hydrogen peroxide (38) was spotted to the  
265 center of the plate (38). Plates were incubated at 30  $^{\circ}$ C for 4-6 d and scored for diameter of resulting  
266 zones of inhibition.

267 *Alcohol stress.*

268 Stationary phase cultures were serially diluted with MP medium (no carbon), plated to solid  
269 medium containing 2% ethanol (38) and incubated at 30  $^{\circ}$ C for 4-6 d and scored for indication of  
270 stress (colony size, small or variable) and viability.

271 *Heat shock.*

272 Mid-exponential phase cultures were placed in a 55 °C water bath for 5 or 10 min (38). Cells were  
273 then transferred to room temperature and serially diluted with MP medium (no growth carbon  
274 source) and plated to solid medium (succinate). After incubation at 30 °C for 4-6 d they were  
275 scored for viability (survival).

## 276 **Assessing population heterogeneity**

277 Isolated colonies were inoculated into 2 mL liquid MP media with either 3.5 mM succinate or 15  
278 mM methanol. Upon growth, cultures were diluted 1/64 into 5 mL of the same liquid media in  
279 sealed Balch tubes and grown for 24 hr (succinate) or 30 hr (methanol) to allow all cultures to  
280 reach stationary phase. After completing this acclimation step, 1 mL of each culture was collected  
281 and centrifuged for 1 minute at 10,000xg. The supernatant was removed and the cell pellet was  
282 resuspended in 500 µL Diluent C containing 2 µL PKH67 dye (PKH67 Green Fluorescent Cell  
283 Linker Kit, Sigma-Aldrich), incubated for 5 minutes at room temperature, and quenched by adding  
284 500 µL 1% BSA solution. Samples were pelleted for 1 minute at 10,000xg and subsequently  
285 washed in equal volumes of 1% BSA (once) followed by MP medium (twice). After a final  
286 resuspension in an equal volume of MP medium, the final mixes were diluted 1/64 into 5 mL MP  
287 media containing 15 mM methanol to initiate experimental cultures and the remainder was mixed  
288 with DMSO to 8% and stored at -80 °C. Samples taken during the experimental growth period  
289 were also mixed with DMSO to 8% and stored at -80 °C. Signal intensity of samples was assessed  
290 via flow cytometry analysis (Beckman Coulter Cytoflex S). After excitation at 488 nm, dye  
291 intensity was measured via emission detected with a 525 nm bandpass filter. Cell gating was  
292 determined by the distribution of red fluorescence detection from the mCherry-tagged strain  
293 CM3839.

## 294 RESULTS

### 295 **Loss of a MarR-family regulator confers formaldehyde resistance.**

296 To test whether the previously identified *ttmR*<sup>EVO</sup> allele (ref 7) is a loss-of-function allele a precise  
297 deletion of the coding region *ttmR* was constructed by allelic exchange in wild-type and its growth  
298 was characterized. The one base-pair deletion in *ttmR*<sup>EVO</sup> was in the open reading frame; the  
299 frameshift at 140/588 nt yielded a truncated protein with 73 amino acids, only 46 of which were  
300 wild-type. The evolved isolate with *ttmR*<sup>EVO</sup> and the  $\Delta$ *ttmR* strain could each use 4 mM  
301 formaldehyde as a sole carbon source, reaching a modest absorbance of ~ 0.10 - 0.13 when 4 mM  
302 formaldehyde was provided. At 6 mM formaldehyde, both the *ttmR*<sup>EVO</sup> and  $\Delta$ *ttmR* mutants failed  
303 to grow after 48 hr, unlike the  $\Delta$ *efgA* strain (Figures 1A and 2A). Growth in the presence of 4 but  
304 not 6 mM formaldehyde was also seen when formaldehyde was added to an additional carbon  
305 source, either succinate or methanol (Figure 1BC). In the absence of exogenous formaldehyde (i.e.,  
306 during growth on succinate or methanol alone), however, the  $\Delta$ *ttmR* strain did not display any  
307 differences in lag time, growth rate, or final yield when compared to wild-type (Figure 2B, C,  
308 Table S2). Phenotypic comparison of *ttmR* and  $\Delta$ *efgA* mutants demonstrate that although the  $\Delta$ *efgA*  
309 mutant was more formaldehyde resistant, the mutations are comparable in that they i) allowed  
310 formaldehyde growth, ii) did not impact growth in the absence of formaldehyde stress, and ii)  
311 conferred formaldehyde resistance during the consumption of alternative carbon sources (Figures  
312 1 and 2) (7).

### 313 **TtmR is not involved in a general stress response.**

314 The exact nature of formaldehyde cytotoxicity in *M. extorquens* is unknown; however, in various  
315 organisms, previous work has identified numerous forms of formaldehyde-induced DNA damage



316 (39, 40) and more recent work has implicated formaldehyde-induced protein damage in human  
317 cell cytotoxicity (41). In considering possible mechanisms of increased formaldehyde resistance,  
318 we recognized that cellular processes that are likely to mitigate formaldehyde-induced damage,  
319 such as DNA repair and protein quality control, might be involved in generalized stress responses  
320 or formaldehyde-specific stress responses. To address whether the loss of TtmR led to a  
321 formaldehyde-specific response, the *ttmR<sup>EVO</sup>* strain was exposed to a variety of other stressors.  
322 Specifically, we chose stressors that addressed the possibilities that the *ttmR<sup>EVO</sup>* mutant might i)  
323 be broadly resistant to aldehydes, ii) confer multidrug resistance (as a homolog of MarR) or iii)  
324 mediate a generalized stress response.

325 Growth assays in media supplemented with various C<sub>2</sub> aldehydes (glyoxal and acetaldehyde), as  
326 well as a few other aldehydes (butyraldehyde, propionaldehyde, and glutaraldehyde) representing  
327 potential metabolic intermediates indicated TtmR appears to be specific to formaldehyde stress. In  
328 both succinate and methanol-based media, the *ttmR<sup>EVO</sup>* mutant showed comparable defects in  
329 growth to WT other than a very subtle growth improvement when either glyoxal or acetaldehyde  
330 was present (Figure S1).

331 To evaluate antibiotic resistance, disk diffusion assays with different antibiotics were performed  
332 with WT or  $\Delta$ *ttmR* mutant soft agar overlays. Wild-type was resistant to 9 of the 14 antibiotics  
333 tested (i.e., no zone of inhibition) (Table S3). Of the five remaining antibiotics, the  $\Delta$ *ttmR* mutant  
334 did not display any increased resistance (i.e., smaller zone), allowing us to conclude that though  
335 there may be differences in specific antibiotic resistances, but there was no broadly acquired  
336 antibiotic resistance (Table S3).

337 Finally, the *ttmR<sup>EVO</sup>* strain was screened for its increased resistance to heat shock (55 °C, treated  
338 24 hr after entry into stationary phase in liquid medium), oxidative stress (H<sub>2</sub>O<sub>2</sub>, soft agar  
339 overlays), and alcohol stress (EtOH, in solid medium). The *ttmR<sup>EVO</sup>* mutant strain behaved similar  
340 to wild-type when exposed to each of the stressors, other than a modest increase in viability during  
341 heat shock, which may indicate an elevated protein stress response (Table S3). Collectively, these  
342 data demonstrate that TtmR is not a general stress response protein but rather its activity is specific  
343 to modulating stress induced by formaldehyde.

#### 344 **TtmR modulates the expression of genes involved in an array of cellular functions.**

345 To understand the impact of TtmR on the transcriptome, we performed RNA-sequencing analysis  
346 on wild-type and the  $\Delta$ *ttmR* mutant during early exponential growth (OD = 0.2) in minimal  
347 medium with 15 mM methanol. Specifically, we aimed to identify differentially expressed genes  
348 (DEGs) that would explain the increased resistance to formaldehyde.

349 A pair-wise comparison of log-transformed counts of wild-type and the  $\Delta$ *ttmR* mutant was  
350 performed and DEGs were identified by imposing a two-fold change cutoff ( $\text{Log}_2\text{FC} > 1.0$ ) with  
351 an adjusted p-value ( $p_{\text{adj}}$ ) less than 0.05. In total, we identified 75 DEGs in the  $\Delta$ *ttmR* mutant, of  
352 which 61 (81%) were upregulated and 14 (19%) were downregulated (Tables 1, Figures 3 and S2).  
353 The expression differences observed in the upregulated genes were quite large; 34 had fold changes  
354  $\geq 4\text{X}$  ( $\text{Log}_2\text{FC} > 2.0$ ) and six had fold changes  $\geq 10\text{X}$  ( $\text{Log}_2\text{FC} \geq 3.3$ ). By contrast, all downregulated  
355 genes had  $\leq 4.6\text{X}$  fold change. Notably, several of the most upregulated DEGs (eg, 5 of the 6 with  
356 fold changes  $\geq 10\text{X}$ ) were clustered in the chromosome in operons or multiple adjacent operons  
357 (Figure 3).

358 Using their RefSeq annotations and Pfam domains, gene functionality of all of the DEGs were  
359 categorized into 14 groups which included 12 groups of genes with inferred functionality (n=58),  
360 one group that encoded hypothetical proteins (n=11), and one group of singletons (n=6), whose  
361 functionality was only represented by a single DEG (Figure S3). Of the 58 DEGs with a proposed  
362 function, the largest categories were Regulatory (n=12), Stress (n=10), Signaling (n=8), and  
363 Transport (n=7). Genes classified as Regulatory were comprised of a variety of transcription  
364 factors, sigma factors, or anti-sigma factors. Of the Regulatory DEGs, three were Crp homologs,  
365 predicted to bind cyclic nucleotides, and three were predicted to have roles in stress response  
366 (oxidative stress, cold shock, and generalized stress response, respectively). As many of the DEGs  
367 are themselves regulatory, the full array of DEGs identified in the *ΔttmR* mutant likely represent  
368 loci that are directly controlled by TtmR and indirectly controlled by TtmR, through other  
369 regulators. The Signaling group included genes that encoded one or more PAS sensor domains  
370 and/or predicted members of two-component regulatory systems such as histidine kinases or  
371 response regulator receivers (single domain or paired with diguanylate cyclase domain). DEGs of  
372 the Stress group encoded universal stress proteins, whose mechanisms are highly variable, and  
373 proteins predicted to be involved in oxidative stress and solvent stress. Genes in the Transport  
374 grouping were involved in a Type I Secretion System (T1SS) and ABC transporters. There was  
375 little indication about the molecules that might be transported, with the exception of an annotated  
376 sulfonate transporter. The remaining DEGs were involved in Carbon metabolism, Cytochrome  
377 metabolism, C-N hydrolase and Chaperone/Heat shock.

378 The DEGs that were downregulated in the *ΔttmR* mutant strain were scattered across functional  
379 categories with the exception of three of the four DEGs encoding Chaperonin/Heat shock proteins.

380 One possibility for the downregulated DEGs is that they are positively regulated by TtmR, when  
381 it is present.

382 Interestingly, we noticed inconsistency in the directionality of expression changes for Chaperone  
383 genes. Chaperonin GroEL, Chaperonin Cpn10, and Heat shock protein Hsp20 were downregulated  
384 while a second Heat shock protein Hsp20 homolog, *Mext\_3498*, was significantly upregulated  
385 (14.5X, Log<sub>2</sub>FC=3.9). *Mext\_3498* was part of the highly upregulated twelve-gene cluster and  
386 appears to be the first gene in a two-gene operon that also encoded a Crp homolog with a cyclic  
387 nucleotide binding motif. These non-uniform changes may reflect the distinct roles of Chaperones  
388 involved in housekeeping protein quality control versus those which are stress-related. The  
389 considerable upregulation of Heat shock protein Hsp20 homolog, *Mext\_3498*, may prevent  
390 formaldehyde-induced protein damage even in the midst of downregulation of Chaperonin GroEL,  
391 Chaperonin Cpn10, and a second homolog of Heat shock protein Hsp20.

392 Of the 75 DEGs identified herein, 20 of them were identified in the 33 previously associated with  
393 the transcriptome of the phenotypically formaldehyde-tolerant subpopulation of wild-type *M.*  
394 *extorquens* described elsewhere (42). We find that the directionalities, but not the magnitudes, of  
395 expression changes are comparable to those found in the formaldehyde-tolerant subpopulation  
396 (Figure 3, Table 1). In all 20 instances, gene expression differences were more pronounced in the  
397 *ΔttmR* mutant than in the subpopulation. The genes of the methanol utilization pathways in the  
398 *ΔttmR* mutant did not meet our conservative criteria for being identified as DEGs. However, closer  
399 examination showed modest decreases (~ 1.3-1.6 fold changes, p-adj < 0.05) in the expression of  
400 *mxoF*, which encodes the large subunit of methanol dehydrogenase (43, 44), as well as genes  
401 involved in formate assimilation and oxidation (Table S4).

402 Overall our data suggests that TtmR elimination allows formaldehyde resistance by tuning the  
403 expression of a number of loci that collectively launch a formaldehyde-specific physiological  
404 response that may include downstream regulation, cyclic nucleotide signaling, transport, and  
405 general stress responses. Notably, the DEGs identified were not involved in cellular functions most  
406 often associated with formaldehyde stress, such as DNA repair or formaldehyde detoxification by  
407 methylotrophic pathways or alcohol/aldehyde dehydrogenases.

#### 408 **TtmR can modulate formaldehyde resistance independent of EfgA.**

409 EfgA is a predicted formaldehyde sensor that modulates formaldehyde resistance by halting  
410 translation in the presence of elevated formaldehyde (7). Like TtmR, the absence of EfgA confers  
411 *M. extorquens* with the ability to grow on formaldehyde as a sole source of carbon and energy  
412 (Figure 1A), presumably because formaldehyde-mediated translational pausing has been  
413 eliminated. Our transcriptomic analysis showed that *efgA* was ~ 2.0X downregulated in the  $\Delta$ *ttmR*  
414 mutant. Thus, our data suggested it was possible that TtmR mediates formaldehyde resistance  
415 through regulating *efgA* expression.

416 To test this hypothesis, we constructed a  $\Delta$ *ttmR*  $\Delta$ *efgA* double mutant by successive allelic  
417 exchange. We then compared the growth of the double mutant to that of each of the single mutants  
418 with variable concentrations of formaldehyde provided in the media. In the absence of exogenous  
419 formaldehyde, growth of the double mutant was indistinguishable from either of the single mutants  
420 (data not shown). By contrast, when 6 mM formaldehyde was added to the growth medium, the  
421  $\Delta$ *ttmR* mutant failed to grow after 24 hr, while the  $\Delta$ *ttmR*  $\Delta$ *efgA* double mutant was more fit than  
422 the  $\Delta$ *efgA* single mutant (Figure 4). These data demonstrated that TtmR has some effects that

423 extend beyond regulating EfgA, although the transcriptomic data suggest that the formaldehyde  
424 resistance of *ttmR* mutants might be partially mediated by decreased *efgA* expression.

425 **TtmR and EfgA are required for optimal transition to methylotrophy.**

426 To understand when TtmR and EfgA would be beneficial to *M. extorquens*, we sought to identify  
427 growth conditions that induced formaldehyde stress in a physiologically relevant context (i.e., from  
428 methanol utilization). Previous work has demonstrated that during the switch from multi-carbon  
429 to single-carbon growth, *M. extorquens* AM1 experiences a transient formaldehyde imbalance,  
430 such that formaldehyde is secreted into the growth medium (45). Researchers suggested that  
431 imbalance occurs as a result of non-transcriptional regulation preventing flux through  
432 methylotrophic pathways where toxic metabolites (formaldehyde, glycine and glyoxylate) are  
433 produced.

434 We assayed growth of wild-type,  $\Delta ttmR$ , and  $\Delta efgA$  strains during the transition to methylotrophy  
435 by subculturing stationary-phase, succinate-grown cells into fresh medium containing methanol as  
436 the sole carbon source. Both mutant strains displayed lag times that were comparable to each other  
437 but significantly longer (by ~ 6 hr) than those observed in wild-type (Table 2, Figure 5A).  
438 However, the growth rates and final yields of all strains were indistinguishable (Table 2). Cell  
439 viability assays uniformly showed that there was no statistically significant decrease in viable cell  
440 counts (WT vs.  $\Delta ttmR$  p-value=0.223, WT vs.  $\Delta efgA$  p-value=0.215) during the apparent lag  
441 phases and indicated that mutant strains take longer to enter exponential growth, rather than  
442 experiencing death (Figure 5C). The ability of strains to transition between distinct modes of  
443 metabolism was further probed in an analogous experiment, where methanol-grown cells (Figure

444 5A) were subcultured into fresh medium containing succinate as the sole carbon source; no growth  
445 defect was observed (Figure 5B).

446 To further characterize the defect in the transition to methylotrophy of the  $\Delta ttmR$  and  $\Delta efgA$  strains,  
447 we monitored formaldehyde accumulation in the culture supernatants. In wild-type, formaldehyde  
448 accumulated in the supernatant and peaked at  $\sim 100 \mu\text{M}$  upon entry into exponential growth,  
449 comparable to previously described results in *M. extorquens* AM1 (35). In the supernatants of the  
450  $\Delta ttmR$  and  $\Delta efgA$  mutants, formaldehyde accumulated to nearly 3-4X the levels observed in wild-  
451 type ( $\sim 275$  and  $\sim 400 \mu\text{M}$ , respectively) demonstrating that formaldehyde resistant mutants have  
452 perturbed formaldehyde metabolism (Figure 5D).

453 Collectively, these data show that during the transition to methylotrophy, formaldehyde imbalance  
454 is exacerbated in the absence of TtmR or EfgA and suggest that both proteins are required for  
455 formaldehyde homeostasis. Therefore, in mutant strains, there is a clear tradeoff between acquiring  
456 formaldehyde resistance and the ability to adapt to methylotrophic growth.

#### 457 **Phenotypic heterogeneity during the transition to methylotrophy.**

458 It has been previously observed that bacterial stressors can provoke phenotypic heterogeneity and,  
459 recently, phenotypic heterogeneity in formaldehyde tolerance was demonstrated in wild-type  
460 populations of unstressed *M. extorquens* PA1 (42). Here, in the presence of elevated formaldehyde,  
461 individual cells experience a binary outcome and either tolerate formaldehyde from the onset of  
462 exposure and grow or succumb to formaldehyde stress and die. As the transition to methylotrophy  
463 leads to formaldehyde imbalance, we wanted to determine if the extended lag times of the  $\Delta ttmR$   
464 and  $\Delta efgA$  mutants during this transition were due to increased variance of individuals entering

465 exponential growth (i.e., some cells initiating growth after a longer time or not at all) or was  
466 indicative of a change in the mean behavior of individuals without increased variance.

467 Tracking the entry into growth in populations by dilution of a membrane-intercalating dye in  
468 individual cells revealed heterogeneous initiation of growth in  $\Delta ttmR$  and  $\Delta efgA$  strains. When  
469 cells were transferred from one methanol-grown culture to fresh medium with methanol, all strains  
470 displayed a gradual and uniform lessening in the distributions of per-cell fluorescence, indicating  
471 uniform growth of cells within these populations (Figures 6 and S4). In contrast, following the  
472 transition to methylotrophic growth, a notable skew, or split, in the distribution was observable by  
473 9 hours. Most pronounced in the  $\Delta efgA$  mutant, this result suggests the existence of a  
474 subpopulation of nongrowing cells in the  $\Delta efgA$  lineages, which is not effectively transitioning to  
475 growth on methanol. The  $\Delta ttmR$  lineages experience a similar delay; however, in this genotype,  
476 the effect is seen as a rightward skew of the distribution rather than as two distinct peaks,  
477 suggesting that not all cells survive the transition. This effect was dramatically diminished in the  
478 wild-type strain, suggesting that it experiences more uniformity and less growth inhibition during  
479 the transition between growth on different carbon substrates across members of the population.  
480 This result is also consistent with bulk growth trends observed in the methylotrophic switch  
481 (Figure 5).

482



483 DISCUSSION

484 During methylotrophic growth, all carbon flows through formaldehyde, a cytotoxic compound that  
485 can potentially damage myriad biomolecules. Accordingly, methylotrophs are more resistant to  
486 formaldehyde than non-methylotrophs (42). In large part, formaldehyde resistance can be  
487 attributed to the constitutively high expression and activity of Fae, which catalyzes the first step  
488 of formaldehyde oxidation and eliminates free formaldehyde from the cytoplasm. Despite this,  
489 formaldehyde pools in *M. extorquens* are elevated in comparison to non-methylotrophs (1, 46–49)  
490 and the mechanisms by which these greater pool sizes are tolerated and regulated are largely  
491 unknown, as are specific mechanisms of averting formaldehyde-induced cellular damage. Recent  
492 work uncovered the role of EfgA in directly sensing formaldehyde and acting to inhibit translation  
493 (7). The current work indicates that TtmR, a MarR-like transcription factor, is a second regulator  
494 in the formaldehyde stress response predicted to act at the level of transcription. TtmR regulates  
495 transcription of *efgA*, but the growth phenotypes of double mutants also indicate that TtmR  
496 regulates other targets beyond this. TtmR and EfgA each contribute to formaldehyde homeostasis  
497 and are particularly critical during the transition to methylotrophic metabolism. The combination  
498 of these distinct systems suggests that formaldehyde metabolism is monitored and managed across  
499 transcriptional and translational regulatory processes.

500 Without TtmR, *M. extorquens* does not display any obvious growth defects during methylotrophic  
501 growth, but instead, displays increased formaldehyde resistance. Increased formaldehyde  
502 resistance, as measured by growth in the presence of increasing formaldehyde concentrations, can  
503 be achieved by alleviating formaldehyde damage or by relaxing regulatory mechanisms that would  
504 otherwise prevent growth in potentially harmful conditions. Characterized formaldehyde stress  
505 response systems in bacteria prevent formaldehyde damage by formaldehyde detoxification and

506 are analogous to formaldehyde oxidation systems used by a variety of methylotrophs for C<sub>1</sub>  
507 utilization (21). In many organisms where formaldehyde stress has been investigated,  
508 formaldehyde-induced DNA damage is often identified and cell damage and death are attributed  
509 to genotoxicity (39, 40, 50). More recently however, formaldehyde-induced proteotoxicity has  
510 been implicated in cytotoxicity in some human tissues (41), in synthetic methylotrophs (51), and  
511 has been suggested by our own work in *M. extorquens* (7, 42). Therefore, other mechanisms of  
512 formaldehyde resistance might activate appropriate DNA repair systems and/or heat shock proteins  
513 to mitigate DNA and/or protein damage.

514 Surprisingly, in the transcriptome of the  $\Delta ttmR$  mutant there are no DEGs that are obviously linked  
515 to methylotrophic pathways, independent formaldehyde detoxifying enzymatic activities, or DNA  
516 repair. Further, of the four genes grouped into Chaperone/Heat shock, three of them are  
517 downregulated in the absence of TtmR. Functional groupings showed that the majority of DEGs  
518 encode regulators, signaling proteins, stress response proteins, hypothetical proteins, and  
519 transporters whose functions and physiological roles are unknown. This variety of DEGs suggests  
520 that formaldehyde resistance may be the result of cumulative, coordinated responses from many  
521 uncharacterized mechanisms.

522 Although increased formaldehyde resistance that emerges in strains lacking TtmR or EfgA could  
523 be an advantageous trait in a methylotroph, we have demonstrated that a physiological and  
524 ecological benefit of TtmR and EfgA is to speed the transition to methylotrophy when endogenous  
525 formaldehyde is known to accumulate. Many *Methylobacterium/Methylorubrum* are plant-  
526 associated and can use methanol derived from plants by pectin metabolism, among other  
527 compounds (26, 52–56). Some, such as *M. extorquens* PA1, which was isolated from *Arabidopsis*  
528 *thaliana*, are epiphytes and live on plant leaf surfaces (26). On leaf surfaces, methanol is released

529 from stomata, small pores in plant tissues that allow gas exchange (57). Methanol availability,  
530 therefore, fluctuates as stomata open and close and is most abundant in the morning, upon the first  
531 stomatal opening of the day (58, 59). To take advantage of this nutritional niche, *M. extorquens*  
532 must quickly transition to methylotrophic metabolism, which necessarily includes production of a  
533 metabolic stressor, formaldehyde (1, 45). Therefore, during this transition the physiological state  
534 of *M. extorquens* must also be prepared for formaldehyde stress to occur. Here, TtmR and EfgA  
535 were shown to be required for the optimal transition to methylotrophic growth and further, in their  
536 absence, excess formaldehyde accumulation was observed, demonstrating dysregulation of  
537 formaldehyde metabolism. On the phylloplane, the organism's native environment, where  
538 methanol emissions are transient and come in bursts, loss of TtmR or EfgA would likely be  
539 disadvantageous and render *M. extorquens* less competitive within its ecological niche where  
540 methanol capture is important.

541 The transition to methylotrophy in *M. extorquens* AM1 has been previously investigated with  
542 systems biology and genetic approaches, but did not identify either the *ttmR* or *efgA* locus (1, 5, 6,  
543 45). There, investigators found that upon transitioning from the multi-carbon growth substrate  
544 succinate to the single-carbon growth substrate methanol, cells have a lag in carbon assimilation  
545 and experience a transient imbalance in formaldehyde metabolism, with formaldehyde  
546 accumulating such that it was secreted into the growth medium (45). Further investigation revealed  
547 that in adapting cells, carbon flux restriction was mediated by methenyl-dH<sub>4</sub>MPT, an intermediate  
548 in the formaldehyde dissimilation that directly inhibits MtdA, the enzyme that generates the  
549 substrate for entry into the Serine Cycle assimilation pathway and may regulate Fae activity by an  
550 unknown mechanism (1). These authors propose carbon flux restriction is an adaptive strategy that  
551 minimizes the accumulation of toxic metabolites generated in methylotrophic pathways, including

552 formaldehyde. As strains defective in dH<sub>4</sub>MPT biosynthesis ( $\Delta mptG$ ) were previously shown to  
553 be more methanol (i.e., formaldehyde) sensitive in the absence of EfgA (7), we conclude that  
554 EfgA-mediated formaldehyde homeostasis does not involve methenyl-dH<sub>4</sub>MPT.

555 All of the phenotypes of the  $\Delta ttmR$  mutant were mirrored in the  $\Delta efgA$  mutant; therefore, we  
556 considered the possibility that TtmR and EfgA were interconnected. Specifically, we considered  
557 whether TtmR was a positive regulator of *efgA* expression. The transcriptomic data initially  
558 seemed to support this possibility, as *efgA* expression was two-fold lower in the  $\Delta ttmR$  mutant.  
559 However, genetic analysis showed that TtmR and EfgA elimination could cause formaldehyde  
560 resistance and a defective switch to methylotrophy independent of one another. Thus, this work  
561 has identified TtmR as a second formaldehyde stress response protein, which can act  
562 independently of EfgA and a role for TtmR and EfgA in formaldehyde tolerance and homeostasis.  
563 Given the phenotypic overlap of these proteins, it is still possible, and perhaps quite likely, that  
564 they independently impact a common cellular function that results in the formaldehyde-associated  
565 phenotypes observed. Alternatively, the overlap may represent that *efgA* expression is just one of  
566 multiple mechanisms that TtmR exerts its effects on formaldehyde homeostasis.

567 Herein, we demonstrate that achieving formaldehyde resistance through the loss of TtmR or EfgA  
568 comes at a cost, as increased formaldehyde resistance simultaneously limits the adaptability of *M.*  
569 *extorquens* to methylotrophic metabolism. The formaldehyde accumulation observed during the  
570 transition to methylotrophy suggest that strains lacking TtmR and EfgA achieve formaldehyde  
571 resistance by losing their ability to sense and respond to perturbations in formaldehyde  
572 homeostasis, rather than by simply improving cellular processes that reduce formaldehyde  
573 damage. Interestingly, this tradeoff can be avoided, as mutations that permitted growth on  
574 formaldehyde that occurred in other loci, *def* and *efgB*, did not cause a defect in the transition to

575 methylotrophy (Figure S5). Therefore, the transcriptomic profile observed in strains lacking TtmR  
576 likely reflects relaxing a combination of cellular components that typically govern formaldehyde  
577 balance as well as those that are responding to the resulting formaldehyde perturbation. The variety  
578 of DEGs, which includes many regulators, suggest that TtmR is part of a larger gene regulatory  
579 network. Additionally, it appears that both TtmR and EfgA are required for *M. extorquens* to  
580 rapidly shift from growth on multi-carbon substrates to growth on one-carbon substrates and may  
581 be of general importance for facultative methylotrophs.

582

583 **Figure 1. Formaldehyde-evolved isolates have increased formaldehyde resistance.**

584 Wild-type (CM2730, black circles) and mutant strains harboring loss-of-function mutations in  
585  $\Delta efgA$  (CM3745, blue triangles) or  $ttmR^{EVO}$  (CM3919, purple squares) were grown in liquid MP  
586 medium with 0, 2, 4, 6, 8, or 10 mM exogenous formaldehyde. Final yields are shown when  
587 formaldehyde was provided as a sole source of carbon and energy (A) or as a stressor when  
588 methanol (B), or succinate (C) was provided as the primary carbon source. *Error bars* represent  
589 the standard error of the mean of biological replicates.

590 **Figure 2. Deletion of  $ttmR$  recapitulates increased formaldehyde resistance.**

591 Wild-type (CM2730, circles) and the constructed  $\Delta ttmR$  mutant (CM4732, squares) were grown  
592 in liquid MP medium containing 0, 4, or 6 mM exogenous formaldehyde (indicated by black,  
593 yellow, or red symbols, respectively). Absorbance up to 48 hours was measured to assess growth  
594 when formaldehyde was provided as a sole source of carbon and energy (A) or as a stressor when  
595 methanol (B), or succinate (C) was provided as the primary carbon source. *Error bars* represent  
596 the standard error of the mean of biological replicates.

597 **Figure 3. Differentially expressed genes in the  $\Delta ttmR$  mutant.**

598 RNA-sequencing analysis was performed on wild-type and the  $\Delta ttmR$  mutant with cells in the  
599 early exponential phase of growth on methanol. The  $\log_2$  fold changes ( $\text{Log}_2\text{FC}$ ) in gene expression  
600 of the  $\Delta ttmR$  mutant were calculated relative to wild-type. Adjusted p-values were also calculated.  
601 Differentially expressed genes are defined as having a  $\text{Log}_2\text{FC} > 1.0$  and  $p_{\text{adj}} < 0.05$ ; each bar  
602 represents an individual gene. Horizontal bars over clusters of genes indicate two or more adjacent  
603 genes with the number of genes clustered indicated above the bar. Gene annotations are provided  
604 in Table 1.

605 **Figure 4. The  $\Delta ttmR$   $\Delta efgA$  double mutant has increased formaldehyde resistance.**

606 Growth of the  $\Delta ttmR$  (CM4732, purple squares),  $\Delta efgA$  mutant (CM3745, blue triangles), and  
607  $\Delta ttmR$   $\Delta efgA$  double mutant (CM4733, pink diamonds) was quantified in liquid MP medium  
608 (succinate) containing 6 mM formaldehyde. *Error bars* represent the standard error of mean of  
609 biological replicates.

610 **Figure 5. The  $\Delta ttmR$  and  $\Delta efgA$  mutants are defective in the transition to methylootrophy.**

611 The wild-type (CM2730, black circles),  $\Delta ttmR$  mutant (CM4732, purple squares), and  $\Delta efgA$   
612 mutant (CM3745, blue triangles) were first acclimated to succinate in liquid MP medium. Their  
613 growth was then assayed upon their inoculation to methanol-based medium by absorbance (A) and  
614 cell viability (C). Formaldehyde concentrations in the growth medium was measured by a  
615 colorimetric assay (D). After reaching stationary phase, the methanol-grown cultures were  
616 subcultured to succinate-based medium and assayed for growth by absorbance (B). We used a  
617 >15% increase from starting absorbance (dashed line) constituted a threshold that marked the end  
618 of lag phase. *Error bars* represent the standard error of mean of biological replicates. In panel D,  
619 individual values are shown and the mean is indicated.

620 **Figure 6. Distribution of cell division during growth on methanol varies depending on the**  
621 **starting growth substrate.**

622 Following acclimation to growth on either single- (methanol) or multi-carbon (succinate)  
623 sources, stationary phase cells were labelled with a fluorescent dye that intercalates into the cell  
624 membrane and thereby allows tracking of cell division through dilution of the starting signal.  
625 Patterns of cell division were measured following 24 hours of growth in methanol (A) or during  
626 shifts from succinate to methanol (B) by measuring fluorescence of individual cells within the  
627 populations using flow cytometry. The resulting data is displayed as distributions of fluorescence

628 intensity that demonstrate how a population does or does not migrate (grow and divide) over  
629 time. Data is plotted as histograms of per-cell fluorescence intensity (measured at the emission  
630 wavelength of 525 nm, FITC channel) of cell populations at different time points across growth.  
631 Each line in a panel represents cell events surveyed for a single (of three) biological replicate  
632 within an equivalent number of cells.  
633



634 **Table 1. Genes differentially expressed in a  $\Delta ttmR$  mutant.**

635 RNA-sequencing analysis was performed on wild-type and the  $\Delta ttmR$  mutant with cells in the  
636 early exponential phase of growth on methanol. The  $\log_2$  fold changes ( $\text{Log}_2\text{FC}$ ) in gene expression  
637 of the  $\Delta ttmR$  mutant were calculated relative to wild-type. Adjusted p-values were also calculated.  
638 Genes detailed here have a  $\text{Log}_2\text{FC} > 1.0$  and  $p_{\text{adj}} < 0.05$ .

639 **Table 2. Growth during carbon substrate transitions.**

640 Growth of succinate- or methanol-grown stationary phase cells subcultured into fresh medium with  
641 15 mM methanol or 3.5 mM succinate, respectively, was monitored. Error shown represents  
642 standard error of the mean of biological replicates. Error was not provided for lag time as resolution  
643 at low cell densities is not sensitive enough to quantify. A two-tailed Student's t-test was performed  
644 to identify statistically significant differences in final yields or growth rates between growth rates  
645 (p-value < 0.05).

646

647 **Figure S1. Treatment of a *AttmR* mutant with alternative aldehydes.**

648 Growth of wild-type (CM2730, black circles) and the *ttmR<sup>EVO</sup>* mutant (CM3919, purple squares)  
649 was quantified in liquid MP medium (succinate) with the addition of (A) 2 mM formaldehyde, (B)  
650 1.25 mM acetaldehyde, (C) 2.5 mM butyraldehyde, (D) 2.5 mM propionaldehyde, (E) 1.25 mM  
651 glyoxal, and (F) 0.157 mM glutaraldehyde. Growth of wild-type was quantified in the same  
652 medium (succinate) without aldehydes and is superimposed in all panels for reference (CM2730,  
653 gray circles). Growth of CM3919 was indistinguishable from wild-type in the absence of aldehyde  
654 stress; data were excluded for visual simplicity. *Error bars* represent the standard error of mean of  
655 biological replicates.

656 **Figure S2. Histogram of adjusted p-values and Log<sub>2</sub>FC values for RNA-Seq.**

657 The distributions of calculated (A) p-values and (B) Log<sub>2</sub>FC values are shown. Bins are defined  
658 in increments of 0.05. The red line shows the curve fit to the Gaussian distribution of Log<sub>2</sub>FC  
659 values.

660 **Figure S3. Distribution of DEGs in different cellular processes.**

661 The pie graph shows the distribution of differentially expressed genes in functional categories  
662 according to cellular process. Categories were assigned by annotation and inference from the  
663 presence of specific Pfam domains. When function could not be inferred (lack of Pfam domain,  
664 domain of unknown function), genes were classified as Hypothetical (orange) and when function  
665 was only represented once, genes were classified as Singletons (white). Number of genes in each  
666 category is indicated as well as the proportion are up- or down-regulated (arrows).

667 **Figure S4. Heterogeneity during the transition to methylotrophic metabolism.**

668 Following acclimation to growth on either single- or multi-carbon sources, stationary phase cells  
669 were labelled with a fluorescent dye that intercalates into the cell membrane and thereby allows  
670 tracking of cell division through dilution of the starting signal. Patterns of growth were tracked in  
671 continued growth in methanol (left column) or during shifts from succinate to methanol (right  
672 column) by measuring fluorescence of individual cells within the populations using flow  
673 cytometry at time points over the course of population growth. The resulting data is displayed as  
674 distributions of fluorescence intensity that demonstrate how a population does or does not migrate  
675 (grow) over time. During continued growth on methanol, there is a uniform decrease in the  
676 fluorescence distribution for the whole population for each of the three strains (left column). In  
677 contrast, a distinct shoulder or even a second peak of the distribution representing cells that  
678 maintain high fluorescence indicates that not all cells have initiated growth simultaneously, if at  
679 all. This second mode of the distribution is seen, at least transiently, for all genotypes but is most  
680 pronounced in magnitude and time that it remains a part of the population for the  $\Delta efgA$  strain.  
681 Data is plotted as histograms of per-cell fluorescence intensity (measured at the emission  
682 wavelength of 525 nm, FITC channel) of cell populations at different time points across growth.  
683 Each timepoint in a panel represents cell events surveyed within an equivalent volume of growing  
684 culture volume. Each panel depicts a single representative biological replicate.

685

686 **Figure S5. Evolved strains with mutations in other loci leading to enhanced formaldehyde**  
687 **growth are not defective in transition to methylotrophy.**

688 Strains with single-base pair mutations in *def* (CM3908, brown diamonds) and *efgB* (CM3783,  
689 green inverted triangles and CM3837, lime-green triangles) were screened for their influence on  
690 lag times during carbon source switch that required the cells to transition to methylotrophic growth.

691 The wild-type (CM2730, black, no symbols),  $\Delta ttmR$  mutant (CM4732, purple squares), and  $\Delta efgA$   
692 mutant (CM3745, blue triangles) were included as controls and/or reference points. Succinate-  
693 acclimated strains were subcultured into fresh liquid MP medium with methanol as the carbon  
694 source and growth was assayed by absorbance. We used a >15% increase from starting absorbance  
695 (dashed line) constituted a threshold that marked the end of lag phase. *Error bars* represent the  
696 standard error of mean of biological replicates.

697

698 **Table S1. Bacterial strains<sup>a</sup> and plasmids<sup>b</sup>.**

699 **Table S2. Growth of the *ΔttmR* mutant is comparable to wild-type in the absence of**  
700 **formaldehyde stress.**

701 *M. extorquens* was grown in MPIPES medium with 3.5 mM succinate or 15 mM methanol as the  
702 sole source of carbon and energy. Error shown represents standard from mean of biological  
703 replicates. Error was not provided for lag time due to poor resolution at low cell densities. A two-  
704 tailed Student's t-test was performed to identify statistically significant differences in final yields  
705 or growth rates between growth rates (p-value < 0.05).

706 **Table S3. The *ΔttmR* mutant does not mediate a general stress response.**

707 The wild-type and the *ttmR<sup>EVO</sup>* mutant were subjected to various stressors, including a panel of  
708 antibiotics, hydrogen peroxide, ethanol, and heat. The resulting stress was phenotypically  
709 manifested by growth inhibition as indicated by zones of inhibition (cm), changes in viability  
710 (CFU/mL), or qualitative decrease in colony size.

711 **Table S4. Transcriptomic analysis of the methylotrophy genes.**

712

713

714

715 REFERENCES

716. Martinez-Gomez NC, Good NM, Lidstrom ME. 2015. Methenyl-  
717 Dephosphotetrahydromethanopterin Is a Regulatory Signal for Acclimation to Changes in  
718 Substrate Availability in *Methylobacterium extorquens* AM1. *J Bacteriol* 197:2020–2026.
719. Vorholt JA, Marx CJ, Lidstrom ME, Thauer RK. 2000. Novel Formaldehyde-Activating Enzyme  
720 in *Methylobacterium extorquens* AM1 Required for Growth on Methanol. *J Bacteriol* 182:6645–  
721 6650.
722. Chistoserdova L, Vorholt JA, Thauer RK, Lidstrom ME. 1998. C1 transfer enzymes and  
723 coenzymes linking methylotrophic bacteria and methanogenic Archaea. *Science* 281:99–102.
724. Marx CJ, Chistoserdova L, Lidstrom ME. 2003. Formaldehyde-detoxifying role of the  
725 tetrahydromethanopterin-linked pathway in *Methylobacterium extorquens* AM1. *J Bacteriol*  
726 185:7160–7168.
727. Marx CJ, Van Dien SJ, Lidstrom ME. 2005. Flux analysis uncovers key role of functional  
728 redundancy in formaldehyde metabolism. *PLoS Biol* 3:e16.
729. Crowther GJ, Kosály G, Lidstrom ME. 2008. Formate as the main branch point for  
730 methylotrophic metabolism in *Methylobacterium extorquens* AM1. *J Bacteriol* 190:5057–5062.
731. Bazurto JV, Nayak DD, Ticak T, Davlieva M, Lambert LB, Quates, CJ, Patel JS, Ytreberg FM,  
732 Shamoo Y, Marx CJ. 2020. EfgA halts bacterial translation in response to intracellular  
733 formaldehyde. *BioRxiv* [Preprint]. 2020 bioRxiv 343392 [submitted 2020 Oct 16].  
734

738. Piatkov KI, Vu TTM, Hwang C-S, Varshavsky A. 2015. Formyl-methionine as a degradation  
736 signal at the N-termini of bacterial proteins. *Microb Cell Fact* 2:376–393.
739. George AM, Levy SB. 1983. Gene in the major cotransduction gap of the *Escherichia coli* K-12  
738 linkage map required for the expression of chromosomal resistance to tetracycline and other  
739 antibiotics. *J Bacteriol* 155:541–548.
7400. George AM, Levy SB. 1983. Amplifiable resistance to tetracycline, chloramphenicol, and other  
741 antibiotics in *Escherichia coli*: involvement of a non-plasmid-determined efflux of tetracycline. *J*  
742 *Bacteriol* 155:531–540.
7431. Cohen SP, Yan W, Levy SB. 1993. A multidrug resistance regulatory chromosomal locus is  
744 widespread among enteric bacteria. *J Infect Dis* 168:484–488.
7452. Cohen SP, Hächler H, Levy SB. 1993. Genetic and functional analysis of the multiple antibiotic  
746 resistance (*mar*) locus in *Escherichia coli*. *J Bacteriol* 175:1484–1492.
7473. Martin RG, Nyantakyi PS, Rosner JL. 1995. Regulation of the multiple antibiotic resistance  
748 (*mar*) regulon by *mar*ORA sequences in *Escherichia coli*. *J Bacteriol* 177:4176–4178.
7494. Martin RG, Rosner JL. 1995. Binding of purified multiple antibiotic-resistance repressor protein  
750 (MarR) to *mar* operator sequences. *Proc Natl Acad Sci U S A* 92:5456–5460.
7515. Chubiz LM, Rao CV. 2010. Aromatic acid metabolites of *Escherichia coli* K-12 can induce the  
752 *marRAB* operon. *J Bacteriol* 192:4786–4789.
7536. Seoane AS, Levy SB. 1995. Identification of new genes regulated by the *marRAB* operon in  
754 *Escherichia coli*. *J Bacteriol* 177:530–535.

7557. Seoane AS, Levy SB. 1995. Characterization of MarR, the repressor of the multiple antibiotic  
756 resistance (*mar*) operon in *Escherichia coli*. *J Bacteriol* 177:3414–3419.
7578. Sharma P, Haycocks JRJ, Middlemiss AD, Kettles RA, Sellars LE, Ricci V, Piddock LJ, Grainger DC. 2017. The multiple antibiotic resistance operon of enteric bacteria controls DNA  
758 repair and outer membrane integrity. *Nat Commun* 8:1444.
7609. Grove A. 2017. Regulation of Metabolic Pathways by MarR Family Transcription Factors.  
761 *Comput Struct Biotechnol J* 15:366–371.
7620. Yurimoto H, Hirai R, Matsuno N, Yasueda H, Kato N, Sakai Y. 2005. HxlR, a member of the  
763 DUF24 protein family, is a DNA-binding protein that acts as a positive regulator of the  
764 formaldehyde-inducible *hxlAB* operon in *Bacillus subtilis*. *Mol Microbiol* 57:511–519.
7621. Chen NH, Djoko KY, Veyrier FJ, McEwan AG. 2016. Formaldehyde Stress Responses in  
766 Bacterial Pathogens. *Front Microbiol* 7:257.
7622. Yasueda H, Kawahara Y, Sugimoto S. 1999. *Bacillus subtilis yckG* and *yckF* encode two key  
768 enzymes of the ribulose monophosphate pathway used by methylotrophs, and *yckH* is required  
769 for their expression. *J Bacteriol* 181:7154–7160.
7703. Parke D, Ornston LN. 2003. Hydroxycinnamate (*hca*) catabolic genes from *Acinetobacter* sp.  
771 strain ADP1 are repressed by HcaR and are induced by hydroxycinnamoyl-coenzyme A  
772 thioesters. *Appl Environ Microbiol* 69:5398–5409.
7724. Tropel D, van der Meer JR. 2004. Bacterial transcriptional regulators for degradation pathways  
774 of aromatic compounds. *Microbiol Mol Biol Rev* 68:474–500, table of contents.



7725. Davis JR, Brown BL, Page R, Sello JK. 2013. Study of PcaV from *Streptomyces coelicolor*  
776 yields new insights into ligand-responsive MarR family transcription factors. *Nucleic Acids Res*  
777 41:3888–3900.
7726. Knief C, Frances L, Vorholt JA. 2010. Competitiveness of diverse *Methylobacterium* strains in  
779 the phyllosphere of *Arabidopsis thaliana* and identification of representative models, including  
780 *M. extorquens* PA1. *Microb Ecol* 60:440–452.
7827. Marx CJ, Bringel F, Chistoserdova L, Moulin L, Farhan UI Haque M, Fleischman DE, Gruffaz  
782 C, Jourand P, Knief C, Lee M-C, Muller EEL, Nadalig T, Peyraud R, Roselli S, Russ L,  
783 Goodwin LA, Ivanova N, Kyrpides N, Lajus A, Land ML, Médigue C, Mikhailova N, Nolan M,  
784 Woyke T, Stoljar S, Vorholt JA, Vuilleumier S. 2012. Complete genome sequences of six  
785 strains of the genus *Methylobacterium*. *J Bacteriol* 194:4746–4748.
7828. Green PN, Ardley JK. 2018. Review of the genus *Methylobacterium* and closely related  
787 organisms: a proposal that some *Methylobacterium* species be reclassified into a new genus,  
788 *Methylorubrum* gen. nov. *Int J Syst Evol Microbiol* 68:2727–2748.
7829. Delaney NF, Kaczmarek ME, Ward LM, Swanson PK, Lee M-C, Marx CJ. 2013. Development  
790 of an optimized medium, strain and high-throughput culturing methods for *Methylobacterium*  
791 *extorquens*. *PLoS One* 8:e62957.
7920. Marx CJ. 2008. Development of a broad-host-range *sacB*-based vector for unmarked allelic  
793 exchange. *BMC Res Notes* 1:1.
7941. Nash T. 1953. The colorimetric estimation of formaldehyde by means of the Hantzsch reaction.  
795 *Biochem J* 55:416–421.

7962. FastQC: A quality control tool for high throughput sequence data. Babraham Bioinformatics.
7933. Bolger AM, Lohse M, Usadel B. 2014. Trimmomatic: a flexible trimmer for Illumina sequence  
798 data. *Bioinformatics* 30:2114–2120.
7994. Kim D, Langmead B, Salzberg SL. 2015. HISAT: a fast spliced aligner with low memory  
800 requirements. *Nat Methods* 12:357–360.
8035. Trapnell C, Roberts A, Goff L, Pertea G, Kim D, Kelley DR, Pimentel H, Salzberg SL, Rinn JL,  
802 Pachter L. 2012. Differential gene and transcript expression analysis of RNA-seq experiments  
803 with TopHat and Cufflinks. *Nat Protoc* 7:562–578.
8046. Liao Y, Smyth GK, Shi W. 2019. The R package Rsubread is easier, faster, cheaper and better  
805 for alignment and quantification of RNA sequencing reads. *Nucleic Acids Res* 47:e47.
8067. Love MI, Huber W, Anders S. 2014. Moderated estimation of fold change and dispersion for  
807 RNA-seq data with DESeq2. *Genome Biol* 15:550.
8088. Gourion B, Francez-Charlot A, Vorholt JA. 2008. PhyR is involved in the general stress response  
809 of *Methylobacterium extorquens* AM1. *J Bacteriol* 190:1027–1035.
8109. Kawanishi M, Matsuda T, Yagi T. 2014. Genotoxicity of formaldehyde: molecular basis of DNA  
811 damage and mutation. *Front Environ Sci Eng China* 2:36.
8140. Grafstrom RC, Fornace AJ Jr, Autrup H, Lechner JF, Harris CC. 1983. Formaldehyde damage to  
813 DNA and inhibition of DNA repair in human bronchial cells. *Science* 220:216–218.

8141. Ortega-Atienza S, Rubis B, McCarthy C, Zhitkovich A. 2016. Formaldehyde Is a Potent  
815 Proteotoxic Stressor Causing Rapid Heat Shock Transcription Factor 1 Activation and Lys48-  
816 Linked Polyubiquitination of Proteins. *Am J Pathol* 186:2857–2868.
8172. Lee JA, Riazi S, Nemati S, Bazarro JV, Vasdekis AE, Ridenhour BJ, Remien CH, Marx CJ.  
818 2019. Microbial phenotypic heterogeneity in response to a metabolic toxin: Continuous,  
819 dynamically shifting distribution of formaldehyde tolerance in *Methylobacterium extorquens*  
820 populations. *PLoS Genet* 15:e1008458.
8243. Nunn DN, Lidstrom ME. 1986. Isolation and complementation analysis of 10 methanol  
822 oxidation mutant classes and identification of the methanol dehydrogenase structural gene of  
823 *Methylobacterium* sp. strain AM1. *J Bacteriol* 166:581–590.
8244. Anderson DJ, Lidstrom ME. 1988. The *moxFG* region encodes four polypeptides in the  
825 methanol-oxidizing bacterium *Methylobacterium* sp. strain AM1. *J Bacteriol* 170:2254–2262.
8265. Skovran E, Crowther GJ, Guo X, Yang S, Lidstrom ME. 2010. A systems biology approach  
827 uncovers cellular strategies used by *Methylobacterium extorquens* AM1 during the switch from  
828 multi- to single-carbon growth. *PLoS One* 5:e14091.
8296. Müller JEN, Meyer F, Litsanov B, Kiefer P, Potthoff E, Heux S, Quax WJ, Wendisch VF,  
830 Brautaset T, Portais J-C, Vorholt JA. 2015. Engineering *Escherichia coli* for methanol  
831 conversion. *Metab Eng* 28:190–201.
8327. Heck HD, Casanova-Schmitz M, Dodd PB, Schachter EN, Witek TJ, Tosun T. 1985.  
833 Formaldehyde (CH<sub>2</sub>O) concentrations in the blood of humans and Fischer-344 rats exposed to  
834 CH<sub>2</sub>O under controlled conditions. *Am Ind Hyg Assoc J* 46:1–3.

8348. Luo W, Li H, Zhang Y, Ang CY. 2001. Determination of formaldehyde in blood plasma by high-  
836 performance liquid chromatography with fluorescence detection. *J Chromatogr B Biomed Sci*  
837 *Appl* 753:253–257.
8389. Nagy K, Pollreisz F, Takáts Z, Vékey K. 2004. Atmospheric pressure chemical ionization mass  
839 spectrometry of aldehydes in biological matrices. *Rapid Commun Mass Spectrom* 18:2473–  
840 2478.
8450. Takahashi K, Morita T, Kawazoe Y. 1985. Mutagenic characteristics of formaldehyde on  
842 bacterial systems. *Mutat Res* 156:153–161.
8431. Chen FY-H, Jung H-W, Tsuei C-Y, Liao JC. 2020. Converting *Escherichia coli* to a Synthetic  
844 Methyloph growing solely on Methanol. *Cell* 182:933–946.e14.
8452. Anthony C. 1982. The biochemistry of methylophs. Academic press London.
8463. Corpe WA, Rheem S. 1989. Ecology of the methylophic bacteria on living leaf surfaces.  
847 *FEMS Microbiol Ecol*.
8484. Van Dien SJ, Okubo Y, Hough MT, Korotkova N, Taitano T, Lidstrom ME. 2003.  
849 Reconstruction of C(3) and C(4) metabolism in *Methylobacterium extorquens* AM1 using  
850 transposon mutagenesis. *Microbiology* 149:601–609.
8555. Sy A, Timmers ACJ, Knief C, Vorholt JA. 2005. Methylophic metabolism is advantageous for  
852 *Methylobacterium extorquens* during colonization of *Medicago truncatula* under competitive  
853 conditions. *Appl Environ Microbiol* 71:7245–7252.

8546. Müller DB, Vogel C, Bai Y, Vorholt JA. 2016. The Plant Microbiota: Systems-Level Insights  
855 and Perspectives. *Annu Rev Genet* 50:211–234.
8567. Abanda-Nkwatt D, Müsch M, Tschiersch J, Boettner M, Schwab W. 2006. Molecular  
857 interaction between *Methylobacterium extorquens* and seedlings: growth promotion, methanol  
858 consumption, and localization of the methanol emission site. *J Exp Bot* 57:4025–4032.
8598. Nemecek-Marshall M, MacDonald RC, Franzen JJ, Wojciechowski CL, Fall R. 1995. Methanol  
860 Emission from Leaves (Enzymatic Detection of Gas-Phase Methanol and Relation of Methanol  
861 Fluxes to Stomatal Conductance and Leaf Development). *Plant Physiol* 108:1359–1368.
8629. Hüve K, Christ MM, Kleist E, Uerlings R, Niinemets U, Walter A, Wildt J. 2007. Simultaneous  
863 growth and emission measurements demonstrate an interactive control of methanol release by  
864 leaf expansion and stomata. *J Exp Bot* 58:1783–1793.
8650. Michener JK, Vuilleumier S, Bringel F, Marx CJ. 2016. Transfer of a Catabolic Pathway for  
866 Chloromethane in *Methylobacterium* Strains Highlights Different Limitations for Growth with  
867 Chloromethane or with Dichloromethane. *Frontiers in Microbiology*.  
868  
869  
870

87Figure 1

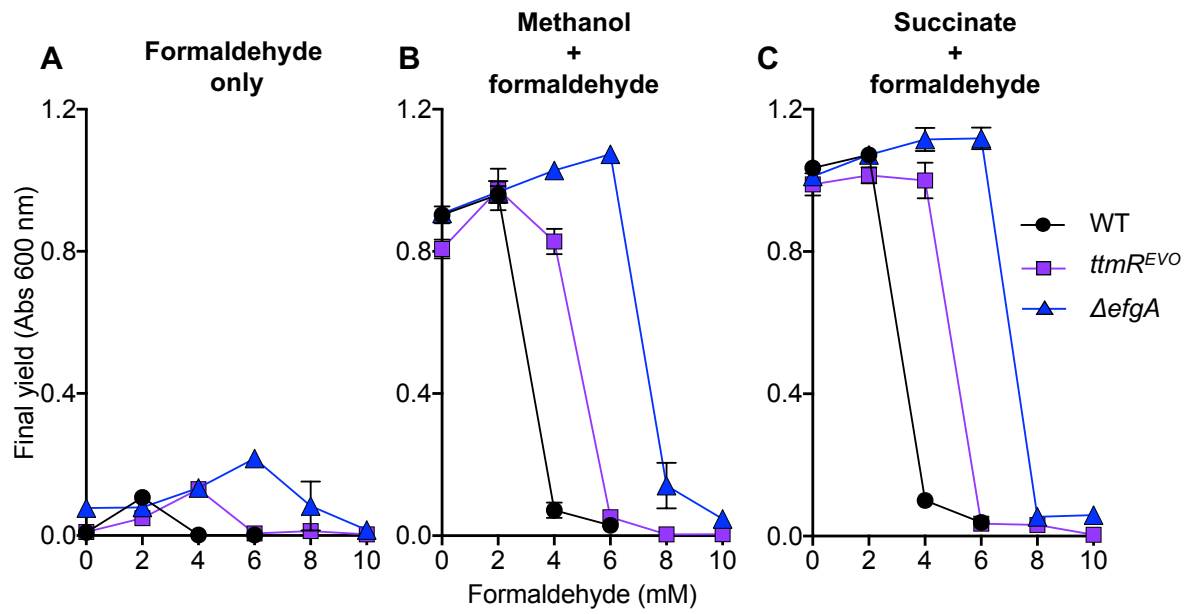

87:

873

875 Figure 2

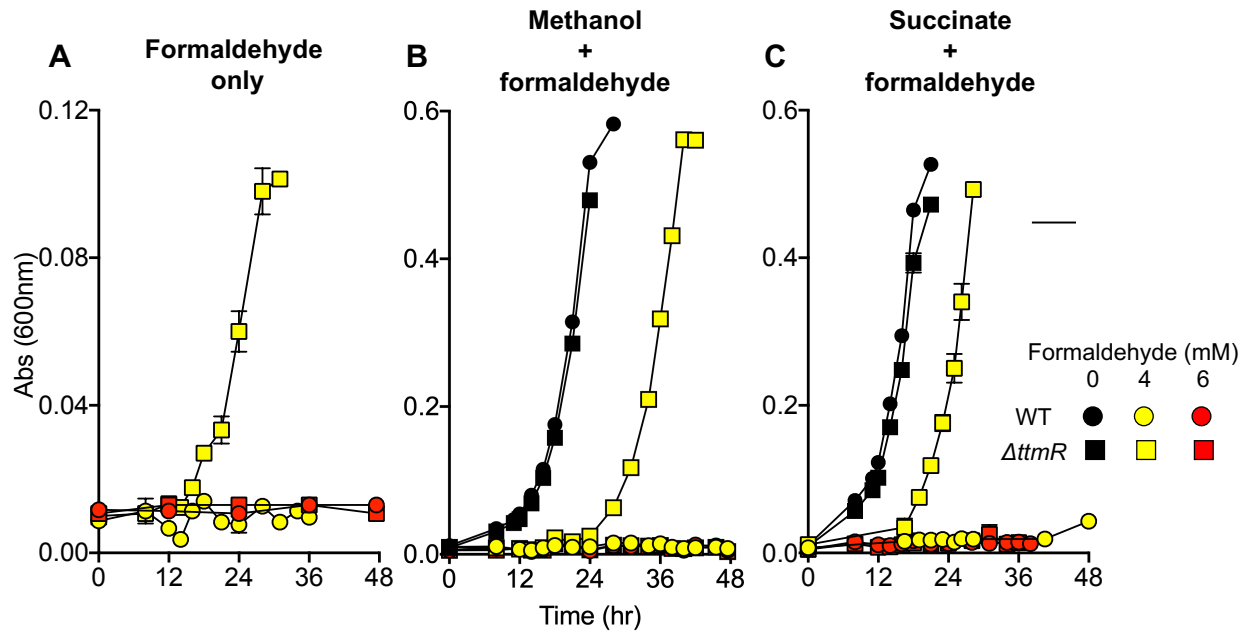

875

876

87 Figure 3

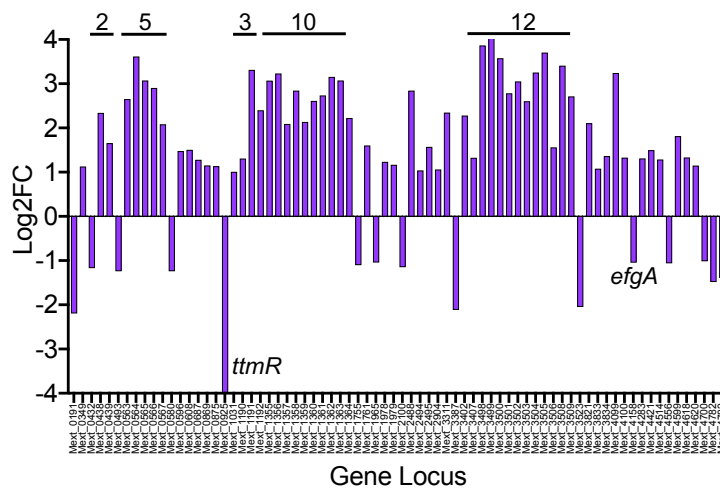

87:

879



88 Figure 4

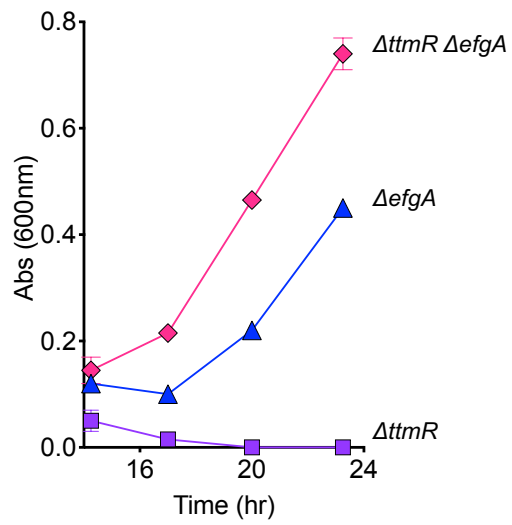

88Figure 5

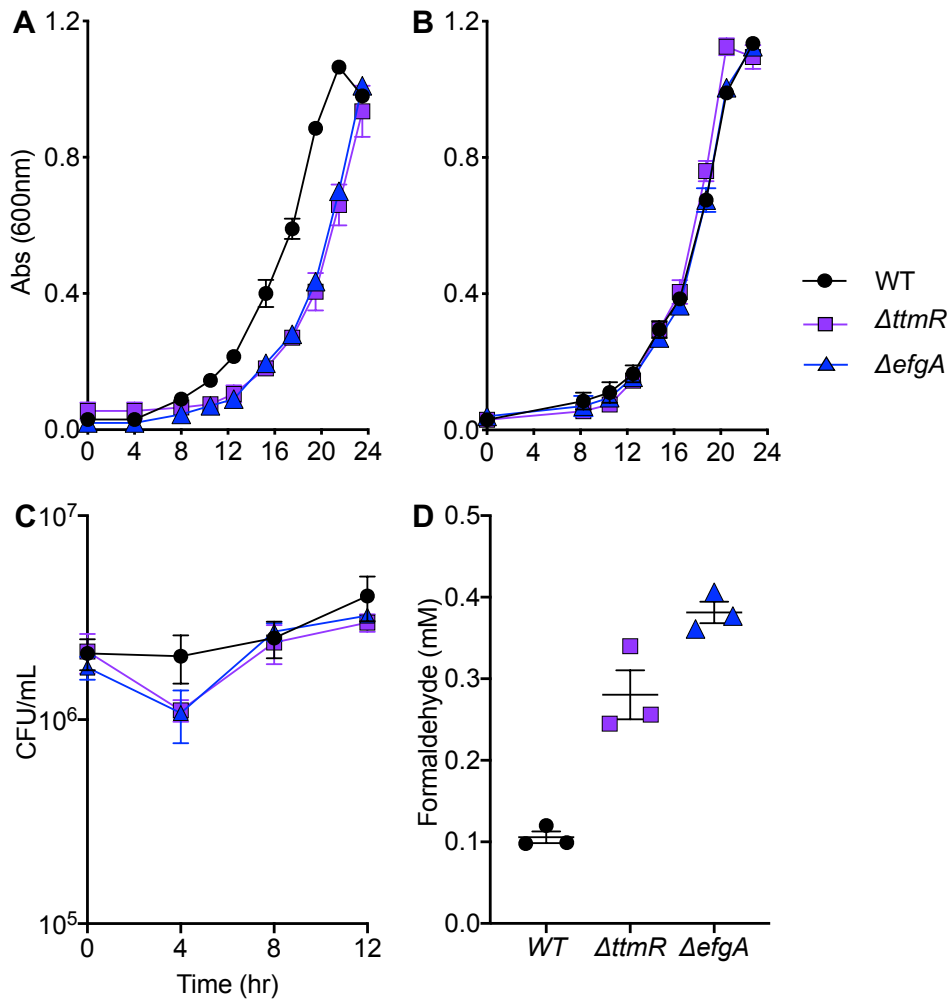

88:

884

88Figure 6

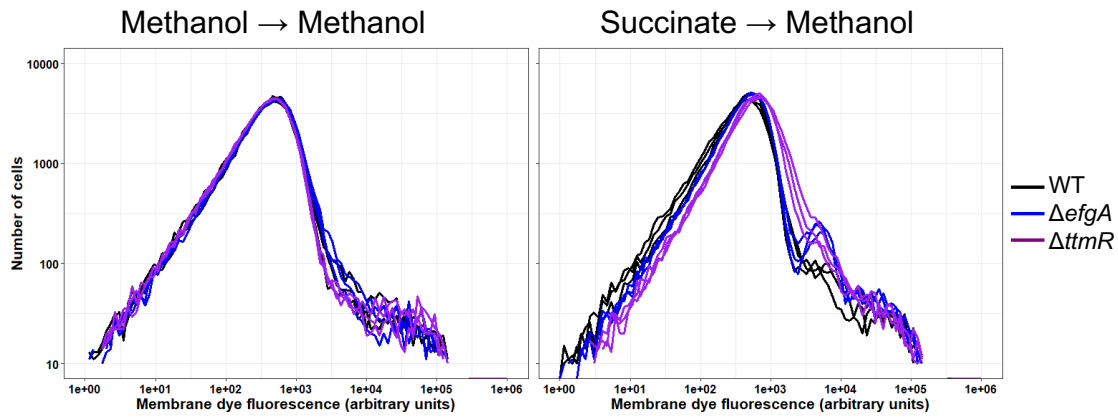

886

887

888 Table 1

889

| Locus     | Annotation (RefSeq)                                   | Functional category         | Log <sub>2</sub> FC | p <sub>adj</sub> |
|-----------|-------------------------------------------------------|-----------------------------|---------------------|------------------|
| Mext_0044 | hypothetical protein                                  | Hypothetical                | 1.015               | 3.00E-3          |
| Mext_0191 | chemotaxis sensory transducer                         | Chemotaxis                  | -2.189              | 2.81E-129        |
| Mext_0349 | flagellin domain protein                              | Motility                    | 1.121               | 8.86E-17         |
| Mext_0432 | ROSMUCR transcriptional regulator                     | Regulatory                  | -1.166              | 8.85E-44         |
| Mext_0438 | hypothetical protein                                  | Signaling                   | 2.335               | 1.36E-143        |
| Mext_0439 | hypothetical protein                                  | Regulatory                  | 1.652               | 1.24E-25         |
| Mext_0493 | hypothetical protein                                  | Inclusion bodies            | -1.235              | 2.44E-16         |
| Mext_0563 | acetate kinase                                        | Central carbon metabolism   | 2.647               | 1.15E-124        |
| Mext_0564 | secretion protein HlyD family protein                 | Transport                   | 3.610               | 0.00             |
| Mext_0565 | ABC transporter related                               | Transport                   | 3.068               | 6.09E-291        |
| Mext_0566 | ABC-2 type transporter                                | Transport                   | 2.898               | 1.08E-144        |
| Mext_0567 | Phosphoketolase                                       | Central carbon metabolism   | 2.076               | 4.73E-148        |
| Mext_0580 | pseudogene                                            | Pseudogene                  | -1.234              | 8.45E-38         |
| Mext_0596 | response regulator receiver                           | Regulatory                  | 1.472               | 3.29E-81         |
| Mext_0608 | helix-turn-helix- domain containing protein AraC type | Regulatory                  | 1.501               | 1.27E-44         |
| Mext_0687 | flagellar FlbT family protein                         | Motility                    | 1.274               | 3.95E-35         |
| Mext_0869 | hypothetical protein                                  | Stress (oxidative)          | 1.149               | 5.60E-10         |
| Mext_0875 | PAS sensor protein                                    | Signaling (heat shock)      | 1.131               | 5.67E-37         |
| Mext_0925 | regulatory protein MarR                               | MarR                        | -9.624              | 1.38E-95         |
| Mext_1031 | glycerone kinase                                      | Central carbon metabolism   | 1.002               | 6.93E-21         |
| Mext_1190 | PAS sensor protein                                    | Signaling                   | 1.304               | 1.92E-64         |
| Mext_1191 | membrane protein of unknown function UCP014873        | Membrane DUF                | 3.307               | 0.00             |
| Mext_1192 | 67 kDa myosin-cross-reactive antigen family protein   | Stress (FA metabolism)      | 2.395               | 1.81E-143        |
| Mext_1355 | UspA domain protein                                   | Stress                      | 3.064               | 0.00             |
| Mext_1356 | cytochrome c class I                                  | Cytochrome metabolism       | 3.227               | 0.00             |
| Mext_1357 | cyclic nucleotide-binding                             | Regulatory (cNMP)           | 2.086               | 6.65E-176        |
| Mext_1358 | ABC transporter related                               | Transport                   | 2.837               | 2.01E-249        |
| Mext_1359 | ABC transporter related                               | Transport                   | 2.131               | 9.30E-160        |
| Mext_1360 | cytochrome bd ubiquinol oxidase subunit I             | Cytochrome metabolism       | 2.607               | 1.66E-216        |
| Mext_1361 | cytochrome d ubiquinol oxidase, subunit II            | Cytochrome metabolism       | 2.728               | 2.92E-238        |
| Mext_1362 | <i>cyd</i> operon protein YbgT                        | Cytochrome metabolism       | 3.150               | 2.69E-256        |
| Mext_1363 | regulatory protein DeoR                               | Regulatory (sugar)          | 3.069               | 0.00             |
| Mext_1364 | amidase                                               | Translation (tRNA charging) | 2.218               | 7.97E-68         |

|           |                                                             |                                      |        |           |
|-----------|-------------------------------------------------------------|--------------------------------------|--------|-----------|
| Mext_1755 | aminoglycoside phosphotransferase                           | Signaling (phosphotransferase)       | -1.098 | 7.26E-27  |
| Mext_1761 | methionine- <i>R</i> -sulfoxide reductase                   | Stress (oxidative), Regulatory (PTM) | 1.598  | 2.08E-37  |
| Mext_1965 | response regulator receiver                                 | Signaling                            | -1.037 | 8.82E-35  |
| Mext_1978 | diguanylate cyclase                                         | Signaling (c-di-GMP)                 | 1.230  | 1.73E-37  |
| Mext_1979 | hypothetical protein                                        | hypothetical                         | 1.160  | 1.62E-08  |
| Mext_2100 | hypothetical protein                                        | Hypothetical (transport)             | -1.145 | 4.33E-38  |
| Mext_2114 | hypothetical protein                                        | Hypothetical                         | 1.186  | 6.88E-3   |
| Mext_2488 | OsmC family protein                                         | Stress (oxidative)                   | 2.837  | 2.28E-184 |
| Mext_2494 | conserved hypothetical membrane spanning protein            | Hypothetical (membrane)              | 1.035  | 2.75E-10  |
| Mext_2495 | CsbD family protein                                         | Stress                               | 1.568  | 2.67E-19  |
| Mext_2904 | hypothetical protein                                        | Regulatory (stress)                  | 1.055  | 2.33E-10  |
| Mext_3311 | hypothetical protein                                        | Hypothetical                         | 2.342  | 4.15E-117 |
| Mext_3387 | hypothetical protein                                        | Hypothetical                         | -2.109 | 2.83E-46  |
| Mext_3402 | hypothetical protein                                        | Hypothetical                         | 2.275  | 2.38E-121 |
| Mext_3407 | ABC transporter related                                     | Transport                            | 1.319  | 3.12E-06  |
| Mext_3498 | heat shock protein Hsp20                                    | Chaperone/Heat shock                 | 3.861  | 0.00      |
| Mext_3499 | putative transcriptional regulatory protein, Crp/Fnr family | Regulatory (cNMP)                    | 4.117  | 0.00      |
| Mext_3500 | UspA domain protein                                         | Stress (universal)                   | 3.573  | 0.00      |
| Mext_3501 | hypothetical protein                                        | Translation (ribosomal conflict)     | 2.779  | 1.99E-260 |
| Mext_3502 | transport-associated                                        | Transport                            | 3.045  | 0.00      |
| Mext_3503 | hypothetical protein                                        | Hypothetical                         | 2.599  | 1.25E-148 |
| Mext_3504 | UspA domain protein                                         | Stress (universal)                   | 3.249  | 0.00      |
| Mext_3505 | regulatory protein Crp                                      | Regulatory (cNMP)                    | 3.699  | 0.00      |
| Mext_3506 | response regulator receiver                                 | Regulatory                           | 1.557  | 9.75E-27  |
| Mext_3508 | UspA domain protein                                         | Stress (universal)                   | 3.401  | 0.00      |
| Mext_3509 | metal-dependent phosphohydrolase HD sub domain              | Signaling                            | 2.707  | 2.11E-242 |
| Mext_3523 | hemolysin-type calcium-binding region                       | C-N hydrolase                        | -2.042 | 8.32E-29  |
| Mext_3821 | choloylglycine hydrolase                                    | C-N hydrolase                        | 2.101  | 1.03E-99  |
| Mext_3833 | cytochrome d ubiquinol oxidase, subunit II                  | Cytochrome metabolism                | 1.073  | 7.21E-17  |
| Mext_3834 | cytochrome bd ubiquinol oxidase subunit I                   | Cytochrome metabolism                | 1.358  | 2.35E-32  |
| Mext_4099 | ATP-binding region ATPase domain protein                    | Signaling                            | 3.238  | 0.00      |
| Mext_4100 | carbonic anhydrase                                          | pH                                   | 1.323  | 4.67E-28  |
| Mext_4158 | EfgA                                                        | Stress                               | -1.041 | 5.94E-35  |
| Mext_4283 | hypothetical protein                                        | Hypothetical                         | 1.306  | 6.29E-15  |
| Mext_4421 | hypothetical protein                                        | Hypothetical                         | 1.492  | 4.11E-24  |

|           |                                             |                             |        |          |
|-----------|---------------------------------------------|-----------------------------|--------|----------|
| Mext_4514 | autoinducer-binding domain protein          | Regulatory (quorum sensing) | 1.280  | 2.40E-39 |
| Mext_4556 | heat shock protein Hsp20                    | Chaperone/heat shock        | -1.055 | 8.33E-33 |
| Mext_4599 | flavin reductase domain protein FMN-binding | Redox rxn                   | 1.809  | 8.86E-10 |
| Mext_4618 | nucleotide sugar dehydrogenase              | Sugar metabolism            | 1.325  | 7.69E-05 |
| Mext_4620 | NAD-dependent epimerase/dehydratase         | Sugar metabolism            | 1.145  | 6.81E-13 |
| Mext_4700 | integrase, catalytic region                 | Phage                       | -1.009 | 1.14E-05 |
| Mext_4782 | chaperonin GroEL                            | Chaperone/Heat shock        | -1.477 | 6.20E-74 |
| Mext_4783 | chaperonin Cpn10                            | Chaperone/Heat shock        | -1.385 | 4.09E-57 |

890

891

892

893

894

895

896

897 Table 2

898

| Switch            | Strain        | Lag (hr) | Final Yield (Abs600) | p-value | Growth rate ( $\mu$ ) | p-value |
|-------------------|---------------|----------|----------------------|---------|-----------------------|---------|
| S $\rightarrow$ M | WT            | 8        | 0.98 +/- 0.028       |         | 0.2139 +/- 0.002      |         |
|                   | $\Delta ttmR$ | 14       | 0.84 +/- 0.014       | 0.090   | 0.2295 +/- 0.011      | 0.031   |
|                   | $\Delta efgA$ | 14       | 0.96 +/- 0.000       | 0.493   | 0.2077 +/- 0.001      | 0.575   |
| M $\rightarrow$ S | WT            | 8        | 1.13 +/- 0.000       |         | 0.2333 +/- 0.018      |         |
|                   | $\Delta ttmR$ | 8        | 1.13 +/- 0.000       | 0.500   | 0.2491 +/- 0.003      | 0.471   |
|                   | $\Delta efgA$ | 8        | 1.12 +/- 0.014       | NV      | 0.2325 +/- 0.018      | 0.960   |

899

900

901
